# Supplementary material for: Electrochromic properties of porous WO3–TiO2 core–shell nanowires
Source: Royal Society of Chemistry journal article supplement (doi:10.1039/c3tc30157e), 2013-01-01
Supplement: c3tc30157e.pdf [file c3tc30157e.pdf]

## Supporting information

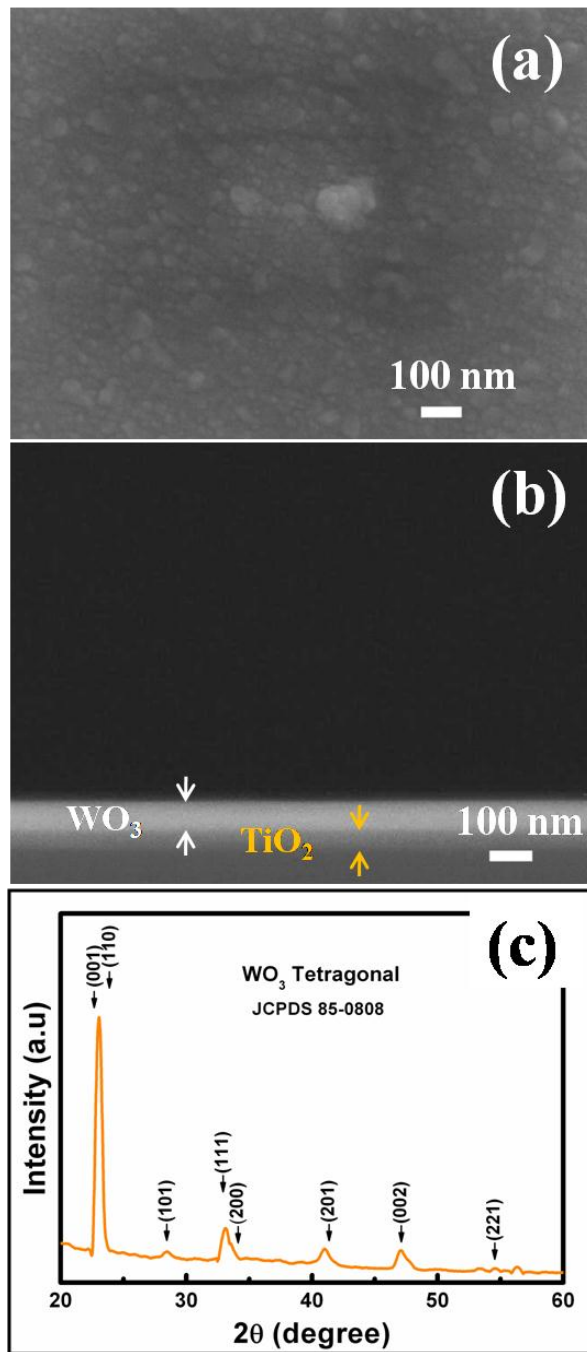

5 **Fig. S1.** SEM images of  $\text{WO}_3$  –  $\text{TiO}_2$  composite thin film. (a) Top view and (b) cross – section view. (c) XRD pattern of the thin film only showed peaks for tetragonal  $\text{WO}_3$ .
